# Supplementary material
Source: PubMed Central journal article supplement (PMC3953686)
Supplement: mmc1.pdf [file mmc1.pdf]

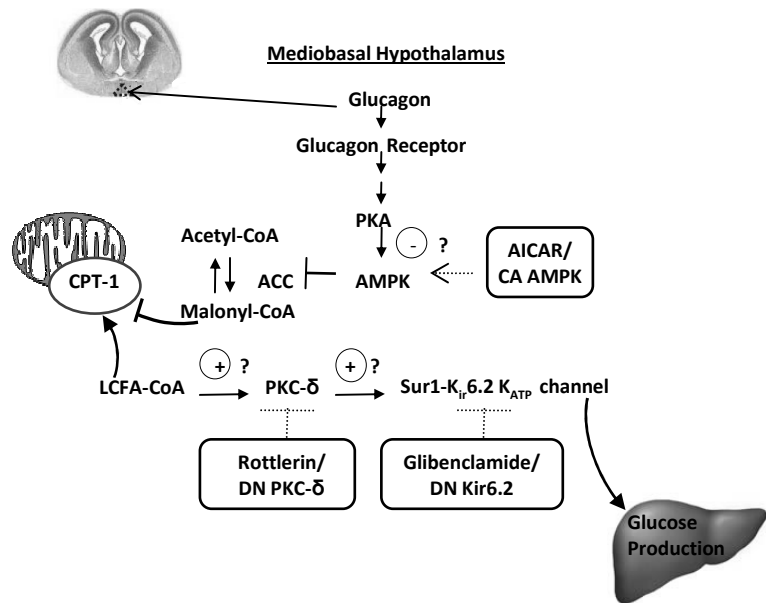

**Supplemental Figure 1a**

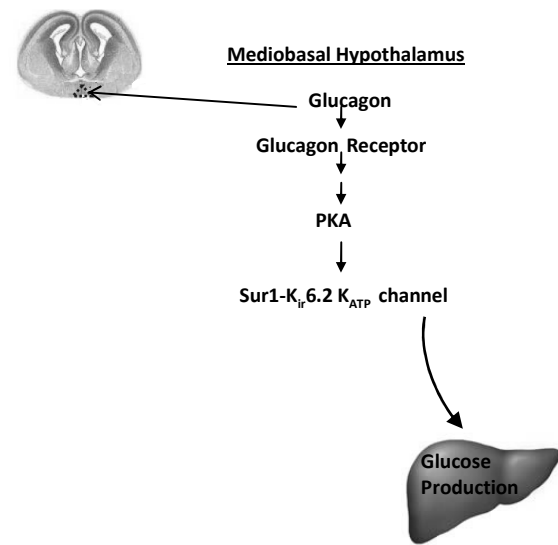

**Supplemental Figure 1b**

|                         | Insulin (ng/ml) | Glucagon (pg/ml) | Glucose (mg/dl) |
|-------------------------|-----------------|------------------|-----------------|
| Saline (n=5)            |                 |                  |                 |
| Basal                   | 0.8 ± 0.1       | 60.1 ± 4.2       | 136.3 ± 10.3    |
| Clamp                   | 0.7 ± 0.2       | 53.7 ± 1.3       | 133.5 ± 10.4    |
| Glucagon (n=5)          |                 |                  |                 |
| Basal                   | 0.8 ± 0.1       | 62.1 ± 2.1       | 139.5 ± 8.3     |
| Clamp                   | 0.7 ± 0.1       | 53.4 ± 2.3       | 129.9 ± 5.7     |
| AICAR+saline (n=5)      |                 |                  |                 |
| Basal                   | 0.8 ± 0.1       | 62.1 ± 2.0       | 129.4 ± 3.9     |
| Clamp                   | 0.8 ± 0.1       | 53.4 ± 2.3       | 133.9 ± 9.5     |
| AICAR+glucagon (n=6)    |                 |                  |                 |
| Basal                   | 1.1 ± 0.2       | 60.7 ± 2.0       | 128.6 ± 4.8     |
| Clamp                   | 0.8 ± 0.1       | 49.9 ± 4.3       | 127.7 ± 11.0    |
| GFP+saline (n=5)        |                 |                  |                 |
| Basal                   | 0.8 ± 0.1       | 60.1 ± 4.2       | 136.3 ± 10.3    |
| Clamp                   | 0.7 ± 0.2       | 53.7 ± 1.3       | 133.5 ± 10.4    |
| CA AMPK+saline (n=5)    |                 |                  |                 |
| Basal                   | 0.7 ± 0.1       | 63.6 ± 3.9       | 130.3 ± 8.0     |
| Clamp                   | 0.7 ± 0.1       | 53.7 ± 1.2       | 124.8 ± 13.3    |
| GFP+glucagon (n=5)      |                 |                  |                 |
| Basal                   | 1.1 ± 0.2       | 64.4 ± 2.1       | 140.9 ± 8.4     |
| Clamp                   | 0.9 ± 0.2       | 54.1 ± 0.8       | 130.6 ± 3.1     |
| CA AMPK+glucagon (n= 5) |                 |                  |                 |
| Basal                   | 1.2 ± 0.2       | 72.7 ± 5.4       | 130.2 ± 4.9     |
| Clamp                   | 0.9 ± 0.3       | 54.7 ± 2.2       | 140.3 ± 5.1     |

**Supplemental Table 1**
